# Supplementary material for: Predictors of Parental Recall of Newborn Hearing Screening Program in Saudi Arabia
Source: MDPI journal article supplement (doi:10.3390/healthcare11091357), 2023-05-08
Supplement: s1 [file s1]

**Table S1.** Predictors of Parental Recall of Newborn Hearing Screening Program Questionnaire

| <b>Section 1: Parents demographic data</b>                                                                                                                         |
|--------------------------------------------------------------------------------------------------------------------------------------------------------------------|
| <b>Q1. Age</b>                                                                                                                                                     |
| - 18-23 years old                                                                                                                                                  |
| - 24-29 years old                                                                                                                                                  |
| - 30-34 years old                                                                                                                                                  |
| - 35-39 years old                                                                                                                                                  |
| - 40-45 years old                                                                                                                                                  |
| - 46-50 years old                                                                                                                                                  |
| - 51-55 years old                                                                                                                                                  |
| - 56-60 years old                                                                                                                                                  |
| - 61 years old and above                                                                                                                                           |
| <b>Q2. Gender</b>                                                                                                                                                  |
| - Male                                                                                                                                                             |
| - Female                                                                                                                                                           |
| <b>Q3. Marital status</b>                                                                                                                                          |
| - Married                                                                                                                                                          |
| - Divorced                                                                                                                                                         |
| - Widow                                                                                                                                                            |
| <b>Q4. Level of education</b>                                                                                                                                      |
| - High school or less                                                                                                                                              |
| - Bachelor's Degree                                                                                                                                                |
| - Master's or Ph.D Degree                                                                                                                                          |
| <b>Q5. Employment</b>                                                                                                                                              |
| - Not currently working                                                                                                                                            |
| - Retired                                                                                                                                                          |
| - Healthcare worker                                                                                                                                                |
| <b>Q6. Household income</b>                                                                                                                                        |
| - Less than 2500 SR                                                                                                                                                |
| - 2500-5000 SR                                                                                                                                                     |
| - 5000-10000 SR                                                                                                                                                    |
| - 10000-20000 SR                                                                                                                                                   |
| - More than 20000 SR                                                                                                                                               |
| <b>Q7. Does any of the parents have chronic disease (e.g., Diabetes, Hypertension, Hyperlipidemia, Cardiac disease, Renal disease, Gastrointestinal disease) ?</b> |
| - Yes                                                                                                                                                              |
| - No                                                                                                                                                               |
| <b>Q8. Are the parents of the child blood relatives (e.g. first cousins) ?</b>                                                                                     |

---

- Yes

- No

---

**Q9. Have you or anyone in your family had a hearing loss that began before the age of 40?**

---

- Yes

- No

---



---

### Section 2: Children information

---

**Q10. Has your child(ren) been diagnosed by a doctor with any of the following health conditions?**

**(check all that apply, if none, please check 'none of the above')**

---

|                                                     | Child 1 | Child 2 | Child 3 |
|-----------------------------------------------------|---------|---------|---------|
|                                                     | Age     | Age     | Age     |
| Allergies                                           |         |         |         |
| Asthma                                              |         |         |         |
| Attention deficit/hyperactivity disorder (ADD/ADHD) |         |         |         |
| Behavioral disorders                                |         |         |         |
| Birth defects                                       |         |         |         |
| Depression                                          |         |         |         |
| Hearing problems                                    |         |         |         |
| Heart problems                                      |         |         |         |
| Lung disease from prematurity                       |         |         |         |
| Overweight or obese                                 |         |         |         |
| Seizures                                            |         |         |         |
| None of the above                                   |         |         |         |

---

**Q11. What year was your child born?**

---

**Q12. What region was your child born in?**

---

- Eastern region  
 - Western region  
 - Central region  
 - Northern region  
 - Southern region

---



---

### Section3: Hearing screening

---

**Q13. Have you ever been concerned about any of the following in your child?**

---

|                   | Yes | No |
|-------------------|-----|----|
| Vision            |     |    |
| Hearing           |     |    |
| Sleep             |     |    |
| Feeding/Nutrition |     |    |
| Development       |     |    |

Speech  
Nutrition  
Behavior  
Speech and language  
School performance

---

**Q13a. What was the reason for concern with your child's [hearing and /speech/speech and language]?**

---

|                                                     | Yes | No |
|-----------------------------------------------------|-----|----|
| Lack of response to sounds                          |     |    |
| Child not responding to voices or said "what" a lot |     |    |
| Child talks loudly                                  |     |    |
| Child's speech is difficult to understand           |     |    |
| Watches TV at loud volume                           |     |    |
| School notified me of concern                       |     |    |
| Behavioral problems                                 |     |    |
| Speech delay                                        |     |    |
| Failed a hearing screening test                     |     |    |
| Ear infections                                      |     |    |
| Family history of hearing loss at young age         |     |    |
| Other                                               |     |    |

---

**Q13b. What was the reason for concern with your child's [behavior/school performance]?**

---

|                                                   | Yes | No |
|---------------------------------------------------|-----|----|
| Difficulty paying attention                       |     |    |
| Child's speech is difficult to understand         |     |    |
| Child does not understand other people            |     |    |
| Difficult social interactions                     |     |    |
| Low grades/not achieving full potential in school |     |    |
| Tantrums/outbursts or disruptive behavior         |     |    |
| Other                                             |     |    |

---

**Q13c. Did your child ever have tubes (tympanostomy tubes) placed in his/her ears?**

---

- Yes  
- No  
- Not sure

---

**Q14. When your child was born, was he/she...**

---

|                                                | Yes | No |
|------------------------------------------------|-----|----|
| Born in a hospital                             |     |    |
| In the neonatal intensive care unit (NICU)     |     |    |
| Premature (earlier than 37 weeks gestation)    |     |    |
| Treated for jaundice                           |     |    |
| Treated for an infection requiring antibiotics |     |    |

---

**Q15. Did your child have a hearing screening test at birth?**

---

- Yes  
- No

---

|                                                                                              |     |    |
|----------------------------------------------------------------------------------------------|-----|----|
| - Not sure                                                                                   |     |    |
| <b>Q16. What were the results?</b>                                                           |     |    |
| - Passed in both ears                                                                        |     |    |
| - Abnormal/failed in one ear                                                                 |     |    |
| - Abnormal/failed in both ears                                                               |     |    |
| - I don't remember                                                                           |     |    |
| <b>Q17. Was any follow-up recommended?</b>                                                   |     |    |
| - Yes                                                                                        |     |    |
| - No                                                                                         |     |    |
| - Not sure                                                                                   |     |    |
| <b>Q18. What was recommended?</b>                                                            |     |    |
| - Observe child for any difficulties                                                         |     |    |
| - Evaluation by pediatrician or family doctor                                                |     |    |
| - Evaluation by ear-nose-throat specialist                                                   |     |    |
| - Obtain hearing test within a few months                                                    |     |    |
| - Obtain hearing test by age 2-3 years                                                       |     |    |
| - Hearing screening test in school                                                           |     |    |
| - Not sure                                                                                   |     |    |
| <b>Q19. Has your child ever had a hearing screening test at school?</b>                      |     |    |
| - Yes                                                                                        |     |    |
| - No                                                                                         |     |    |
| - Not sure                                                                                   |     |    |
| <b>Q20. What were the results?</b>                                                           |     |    |
| - Passed                                                                                     |     |    |
| - Failed/abnormal                                                                            |     |    |
| - Not sure                                                                                   |     |    |
| <b>Q21. Did your child have follow-up after the failed school hearing screening test(s)?</b> |     |    |
| - Yes                                                                                        |     |    |
| - No                                                                                         |     |    |
| - Not sure                                                                                   |     |    |
| <b>Q22. What follow-up did your child have?</b>                                              |     |    |
|                                                                                              | Yes | No |
| Evaluation by pediatrician or family doctor                                                  |     |    |
| Evaluation by ear-nose-throat specialist                                                     |     |    |
| Hearing test at health department                                                            |     |    |

Hearing test in audiology office

---

**Q23. When did follow-up occur after the failed school hearing screening test(s)?**

---

- 0 - 6 months later
  - 7 -12 months later
  - Over 1 year later
  - Unsure
- 

**Q24. What was the result of the follow-up?**

---

- Hearing is normal without treatment
  - Hearing loss, improved without treatment
  - Hearing loss, required treatment
- 

**Q25. Were any of the following treatments done or accommodations made?**

---

|                                                 | Yes | No |
|-------------------------------------------------|-----|----|
| Medical treatment (antibiotics, other medicine) |     |    |
| Surgical treatment (ear tubes, other surgery)   |     |    |
| Sitting up front in class                       |     |    |
| FM system or assistive device                   |     |    |
| Hearing aids                                    |     |    |
| Continued monitoring with further hearing tests |     |    |
| Other                                           |     |    |

---

**Q26. Why did your child NOT have follow-up after the failed hearing screening test at school?**

---

- My child had a cold/infection at the time of the school screening test
- 

- Hearing seemed fine to me
  - I was told the problem was temporary
    - Scheduling problems
    - Not sure where to go
    - Cost/insurance problems
    - Too busy/didn't have time
  - Other
- 

**Q27. In Saudi Arabia, all hospitals perform a hearing screening test on newborns. National standards for hearing screening tests of older children are being considered.**

*Would you support national legislation that would require routine hearing screening tests in older children at the following ages?*

---

|                       | Yes | No |
|-----------------------|-----|----|
| 2-3 years (preschool) |     |    |

6-7 years (1<sup>st</sup> grade)  
 10-11 years (5<sup>th</sup> grade)  
 16-17 years (11<sup>th</sup> grade)

---

**Q28. If routine hearing screening tests were required at the following ages, where would you prefer your child(ren)'s testing occur?**

---

|                                        | School | Pediatrician/<br>family doctor's<br>office | Local health<br>department | Audiology or ear-<br>nose-throat<br>specialist office |
|----------------------------------------|--------|--------------------------------------------|----------------------------|-------------------------------------------------------|
| 2-3 years<br>(preschool)               |        |                                            |                            |                                                       |
| 6-7 years<br>(1 <sup>st</sup> grade)   |        |                                            |                            |                                                       |
| 10-11 years<br>(5 <sup>th</sup> grade) |        |                                            |                            |                                                       |
| 16-17 years (11 <sup>th</sup> grade)   |        |                                            |                            |                                                       |

---

**Q29. If you had concerns in the future regarding your child's hearing, who would you take him/her to see?**

---

|                                               | Yes | No |
|-----------------------------------------------|-----|----|
| School personnel involved with screening test |     |    |
| Pediatrician or family doctor                 |     |    |
| Ear-nose-throat specialist                    |     |    |
| Audiologist                                   |     |    |
| I don't know                                  |     |    |

---
